# Supplementary material for: The role of two major nucleoid-associated proteins in Streptomyces, HupA and HupS, in stress survival and gene expression regulation
Source: PubMed Central journal article supplement (PMC11472566; doi:10.1186/s12934-024-02549-0), 2024-10-14
Supplement: 12934_2024_2549_MOESM1_ESM.pdf [file 12934_2024_2549_MOESM1_ESM.pdf]

## Supplementary Data

Table S1

*Streptomyces coelicolor* strains used in the study

| Strain    | Relevant genotype                                                  | Sources or reference   |
|-----------|--------------------------------------------------------------------|------------------------|
| M145      | SCP1- SCP2-                                                        | Bentley et al., 2002   |
| ASMK011   | M145 $\Delta hupA::scar$                                           | Strzałka et. al., 2022 |
| K304      | M145 $\Delta hupS::higro$                                          | Salerno et. al., 2009  |
| ASMK019   | M145 $\Delta hupA::scar \Delta hupS::higro$                        | This study             |
| ASMK019.2 | M145 $\Delta hupA::scar \Delta hupS::higro$<br>pSET152 <i>hupA</i> | This study             |

Table S2

Oligonucleotides used in the study

| Primer name | Sequence              |
|-------------|-----------------------|
| sigma_FW    | GGCTGGAGGCAAGGTTTCGTG |
| sigma_RV    | GCCGAGGCGATGTCGATCTC  |
| gvp_FW      | CGACGTGCTGGAGCTTGTCT  |
| gvp_RV      | CAGGATCTCGATGCCGACCA  |
| dpsA_FW     | GCACCTGACCCTCAAGCAC   |
| dpsA_RV     | GTCGTCCCCTTCCGCTC     |
| ecrA_FW     | GGCACCCGCAACGACACC    |
| ecrA_RV     | CCAGCAGCGTCCAGCCGA    |

|              |                                           |
|--------------|-------------------------------------------|
|              |                                           |
| fab_FW       | TGGAGCGGACGATGGACAC                       |
| fab_RV       | GCCAGGTCGGAGGTGAGG                        |
| lsr_FW       | CGTGTCGTGGTCACTCTCTTTG                    |
| lsr_RV       | GGCATTGGCTTCGTTTCAGGT                     |
| nsdA_FW      | GCCCACCGCCCAGAAGTA                        |
| nsdA_RV      | GCTGGAGAGGATGTAGGAGCC                     |
| sigB_FW      | CGACGACTTCCACGCCCT                        |
| sigB_RV      | ATGTCCTTCTGGGTGAGTTCCT                    |
| rfsA_FW      | TTCCGGCTCACCCGTGACG                       |
| rfsA_RV      | TCGACCAGCAGCAGACCC                        |
| hrdBRT_f     | TGCTCTTCCTGGACCTCATC                      |
| hrdBRT_r     | GTAGCCCTTGGTGTAGTCGAA                     |
| hupA_pSET_FW | GCTTGGGCTGCAGGTCGACTCGAACTACATCATCCCCAG   |
| hupA_pSET_RV | CGATATCGCGCGCGGCCGCGCTACTTGCCCTTGGCGGCTTC |

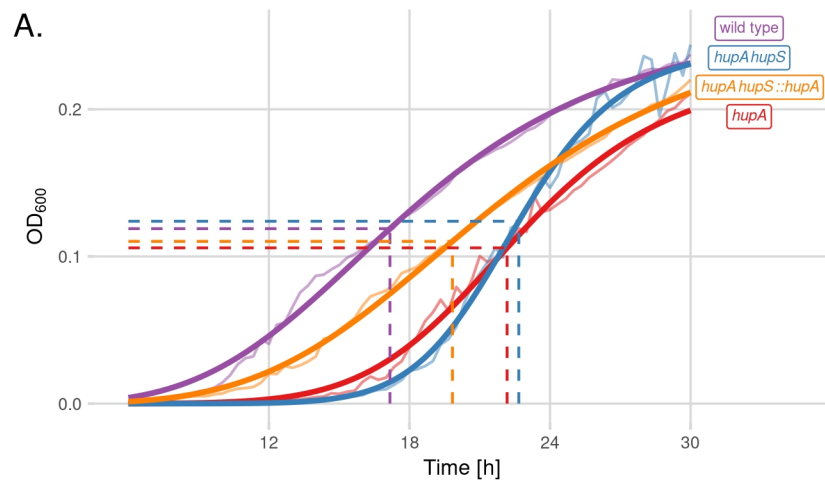

B. Wild type

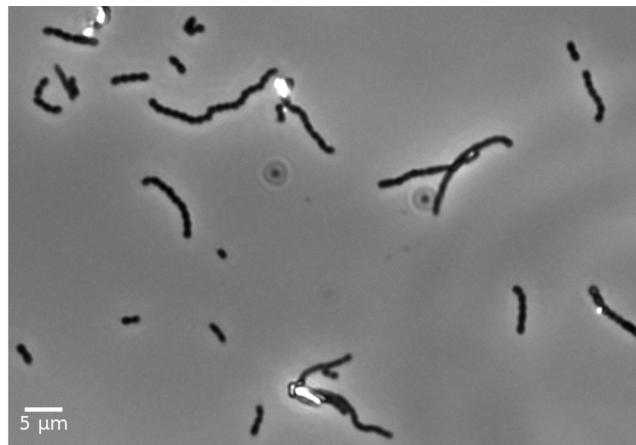

$\Delta hupA \Delta hupS$

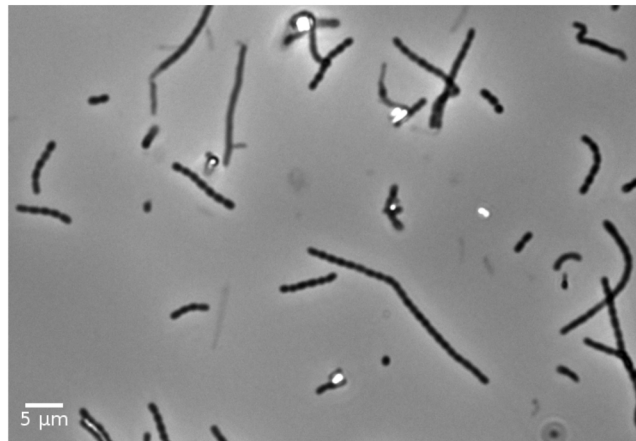

Figure S1

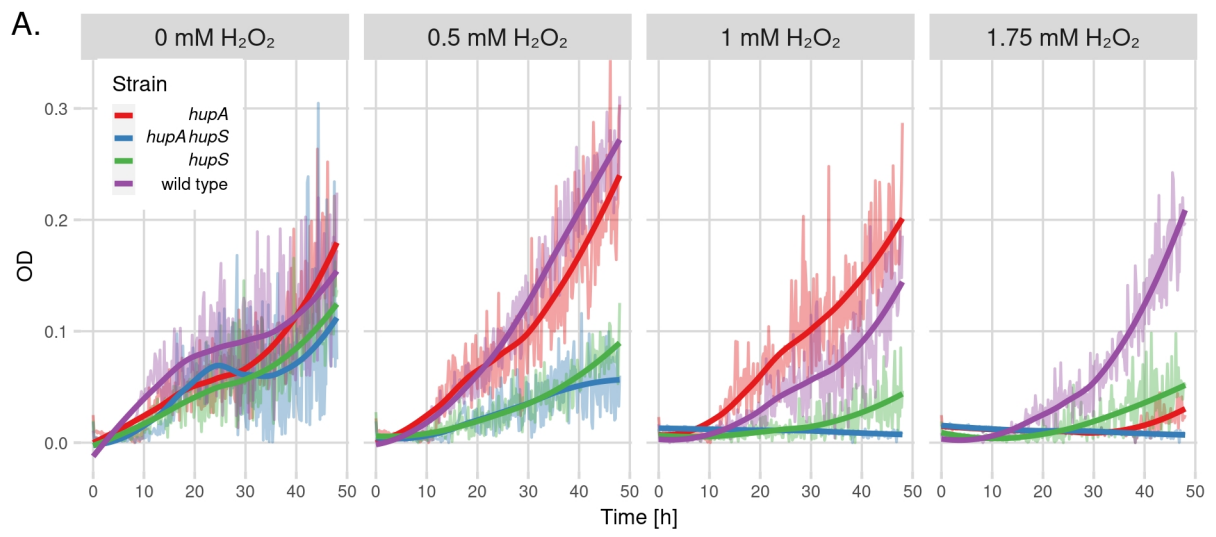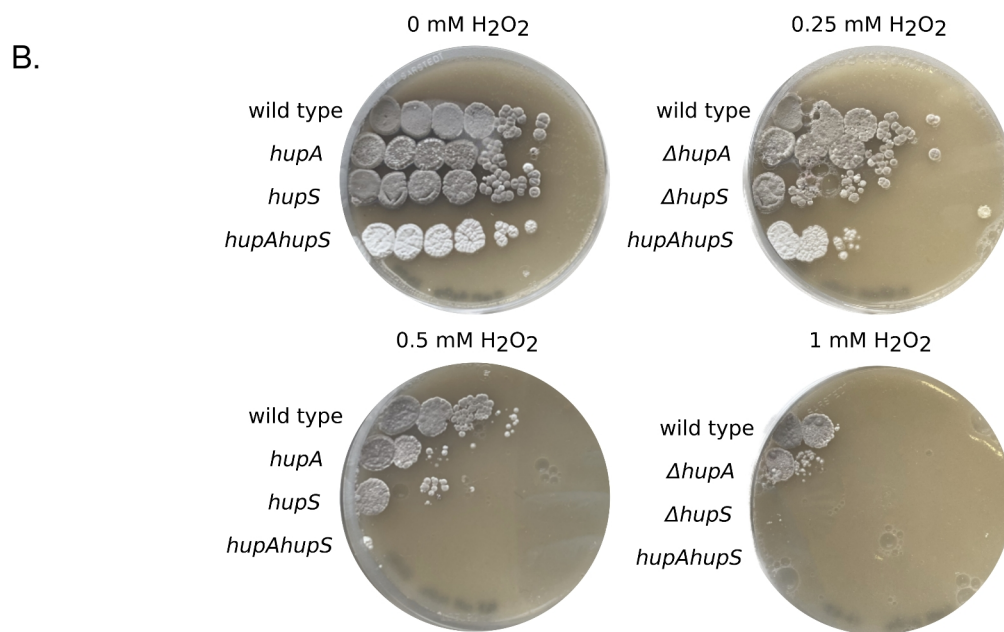

**Figure S2**

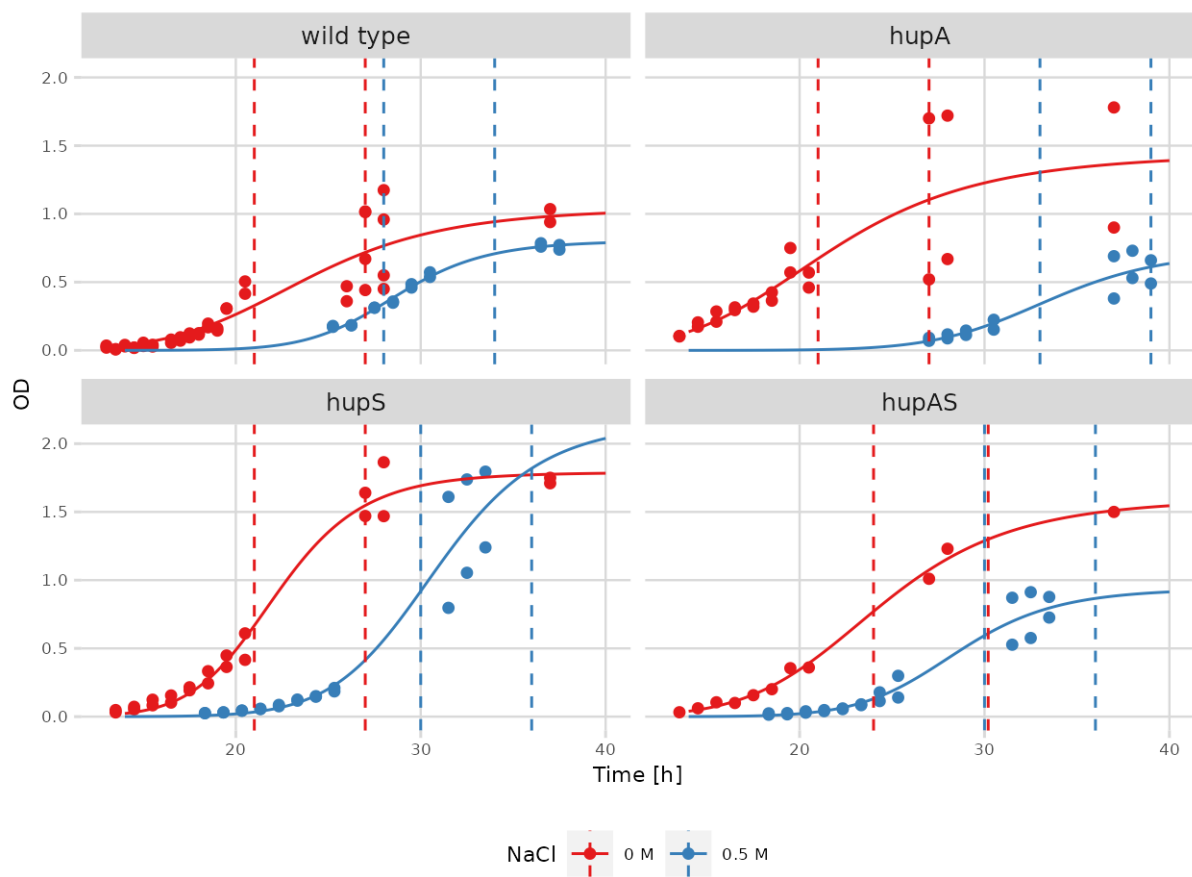

Figure S3

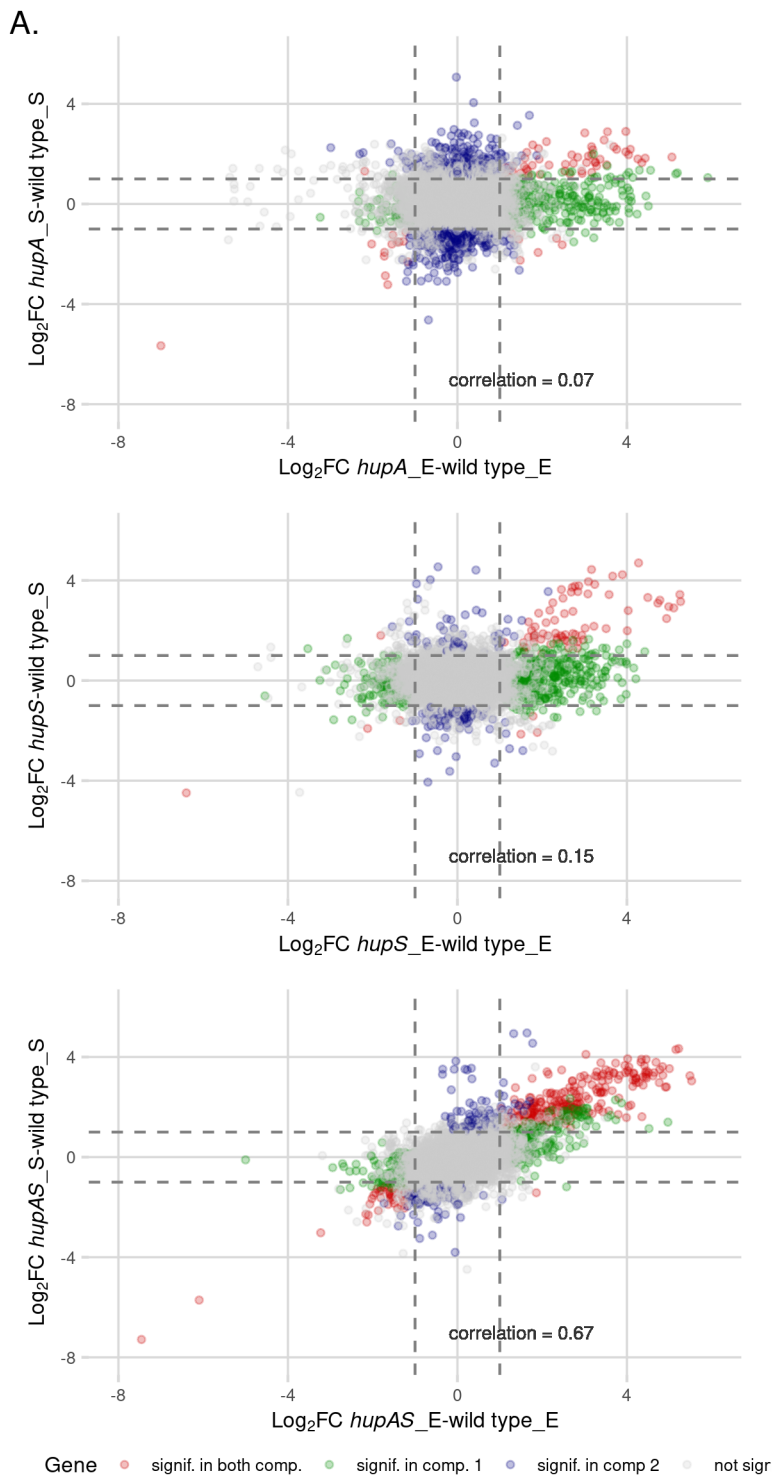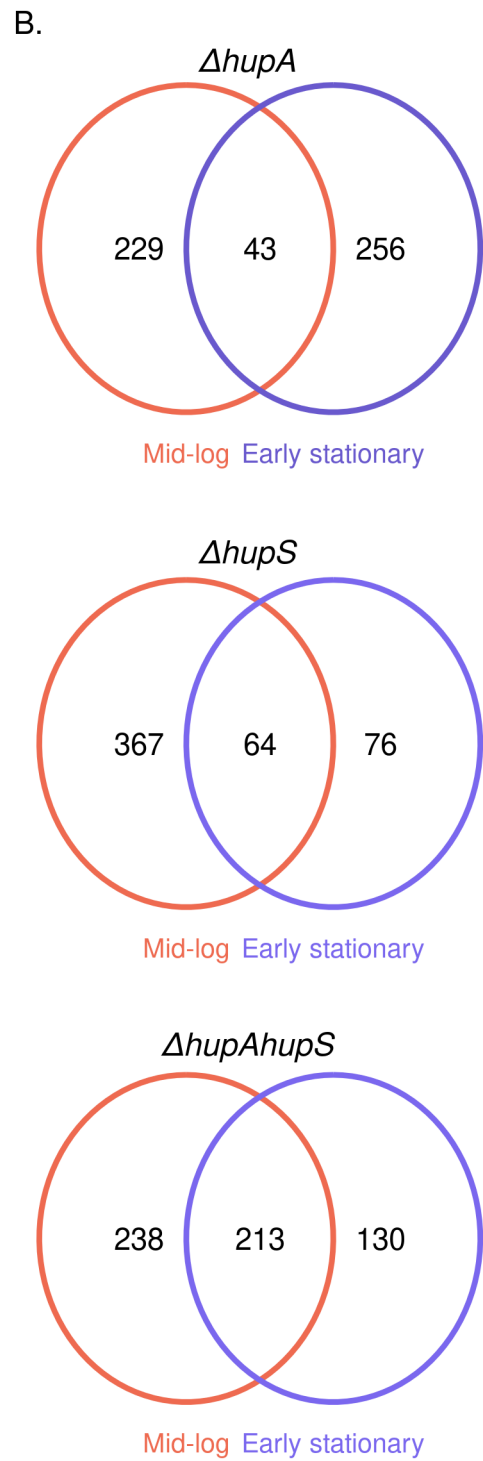

**Figure S4**

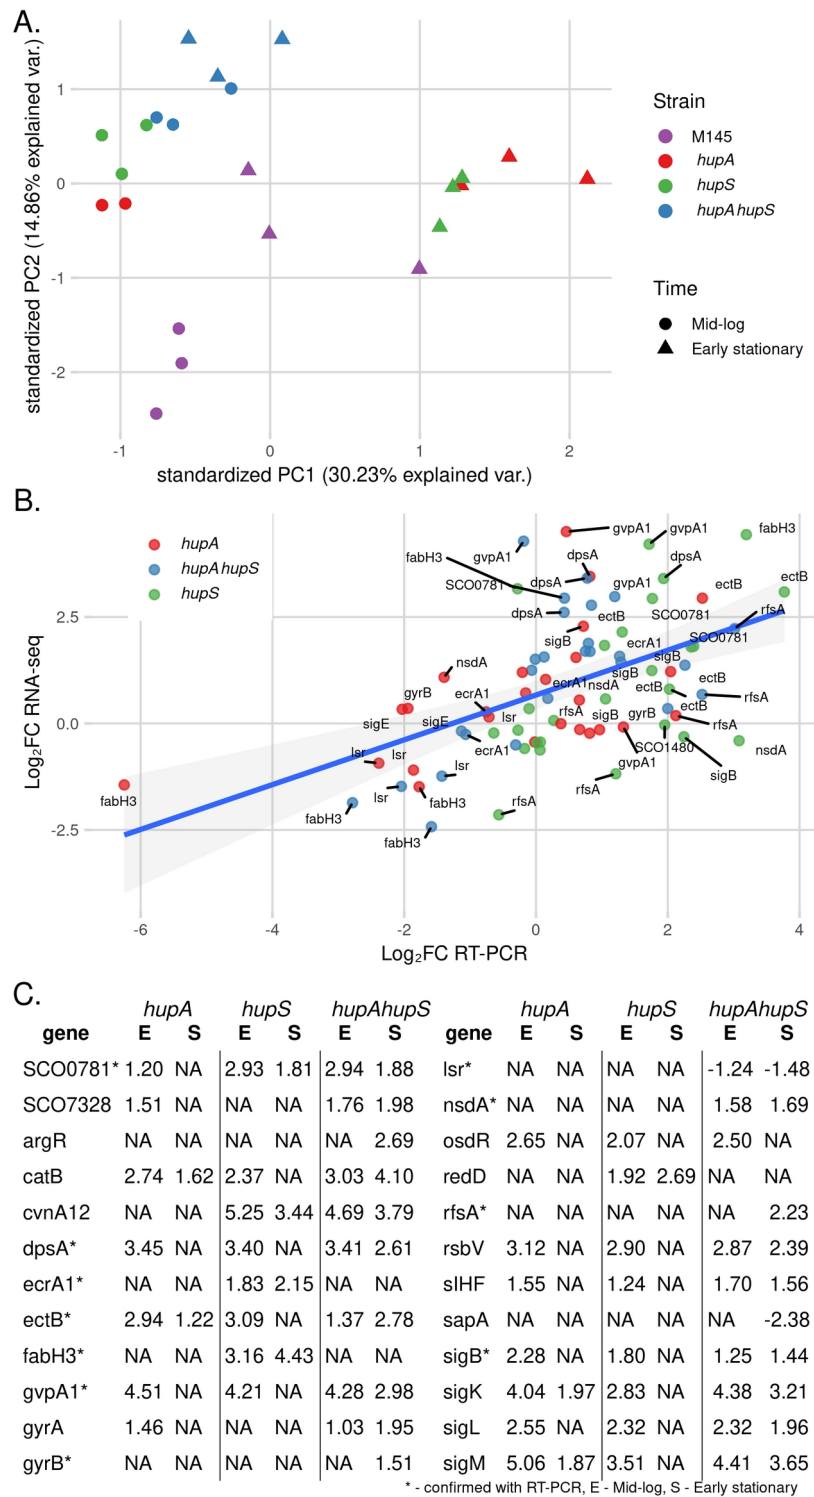

Figure S5

A.

ArgR regulon

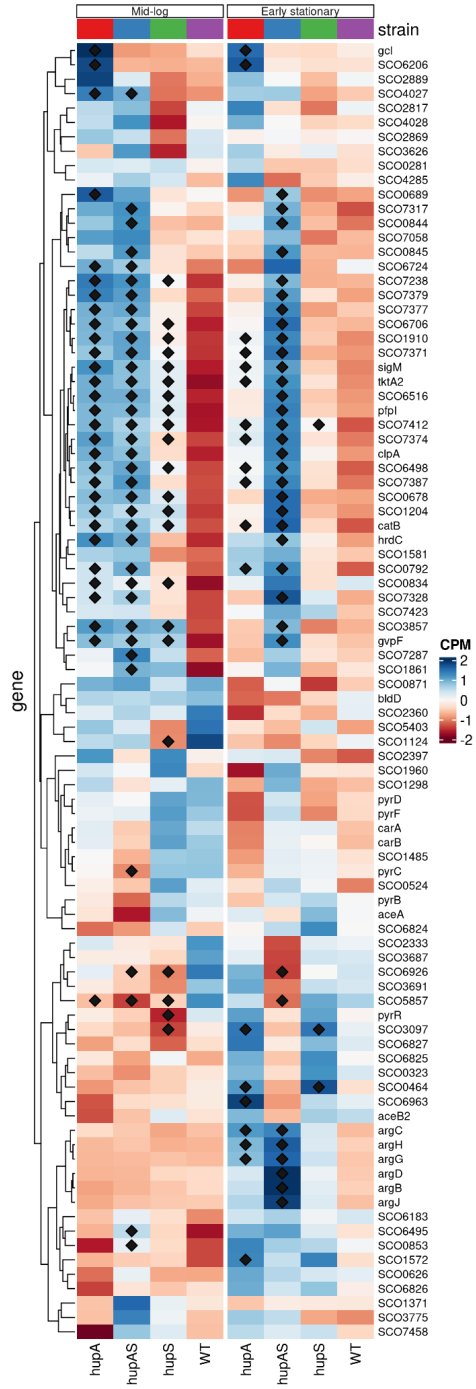

B.

OsdR regulon

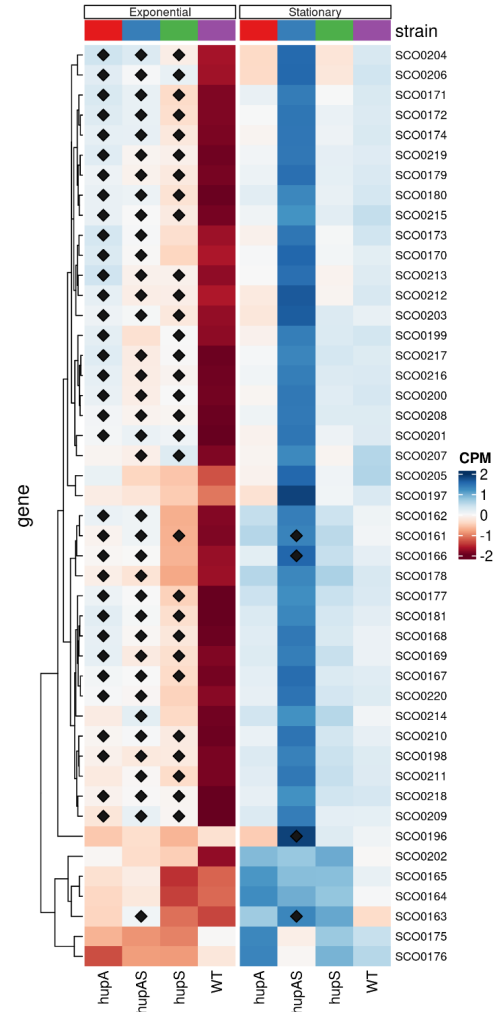

Figure S6



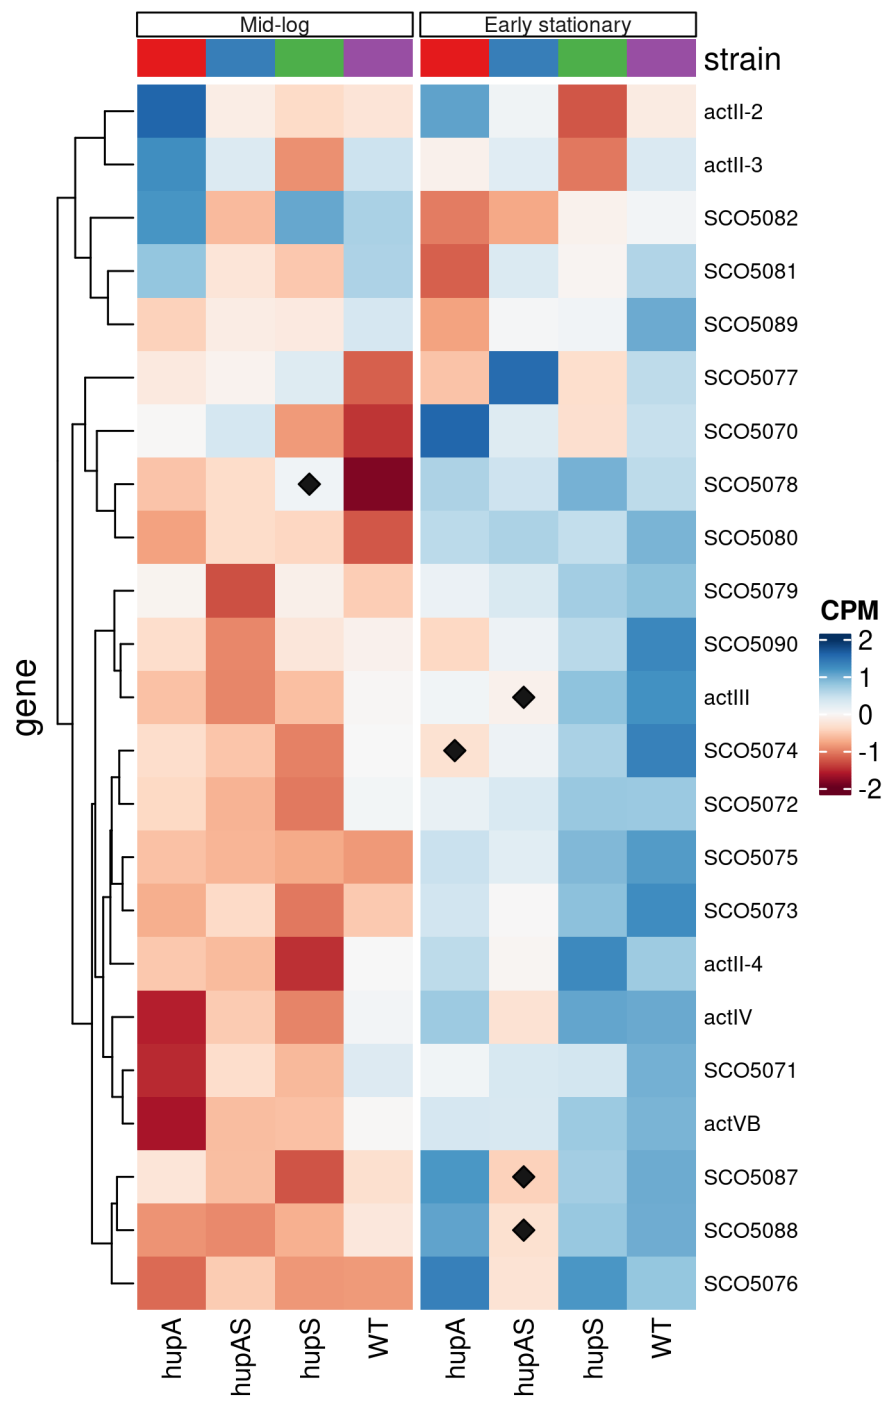

**Figure S7**

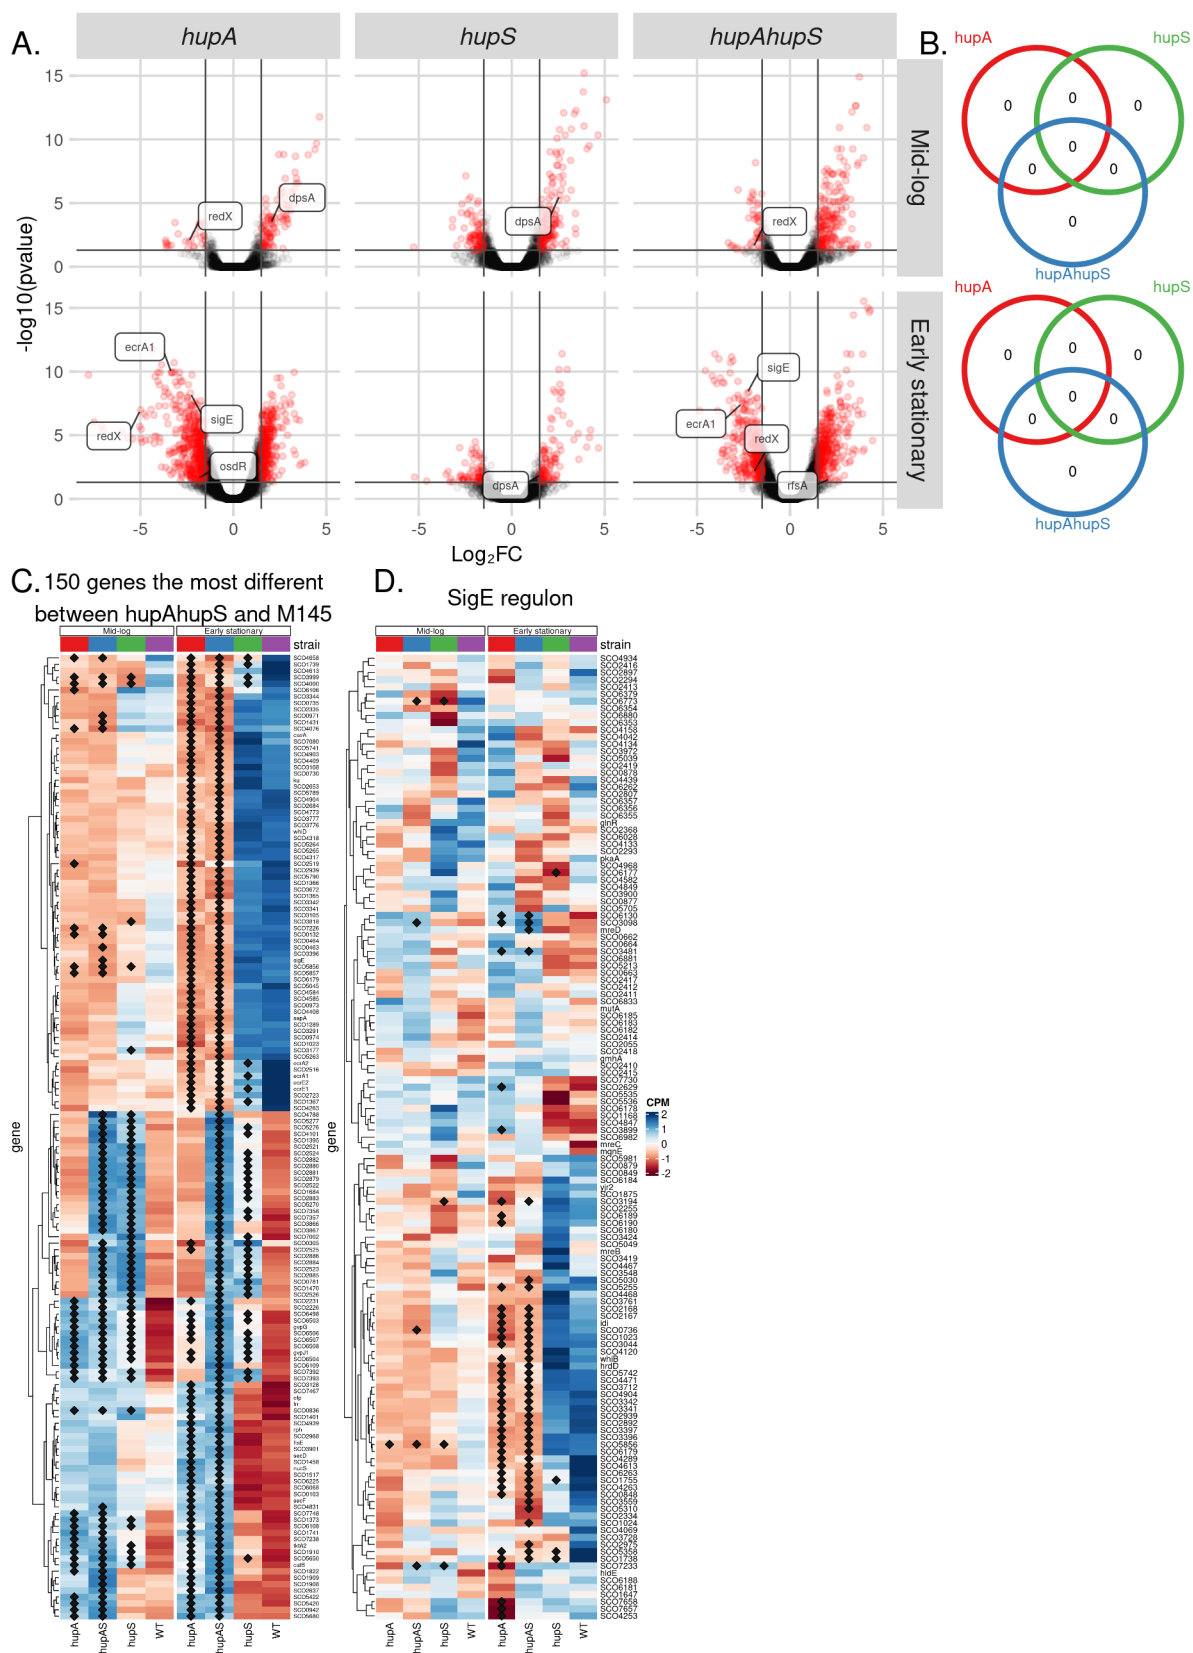

Figure S8

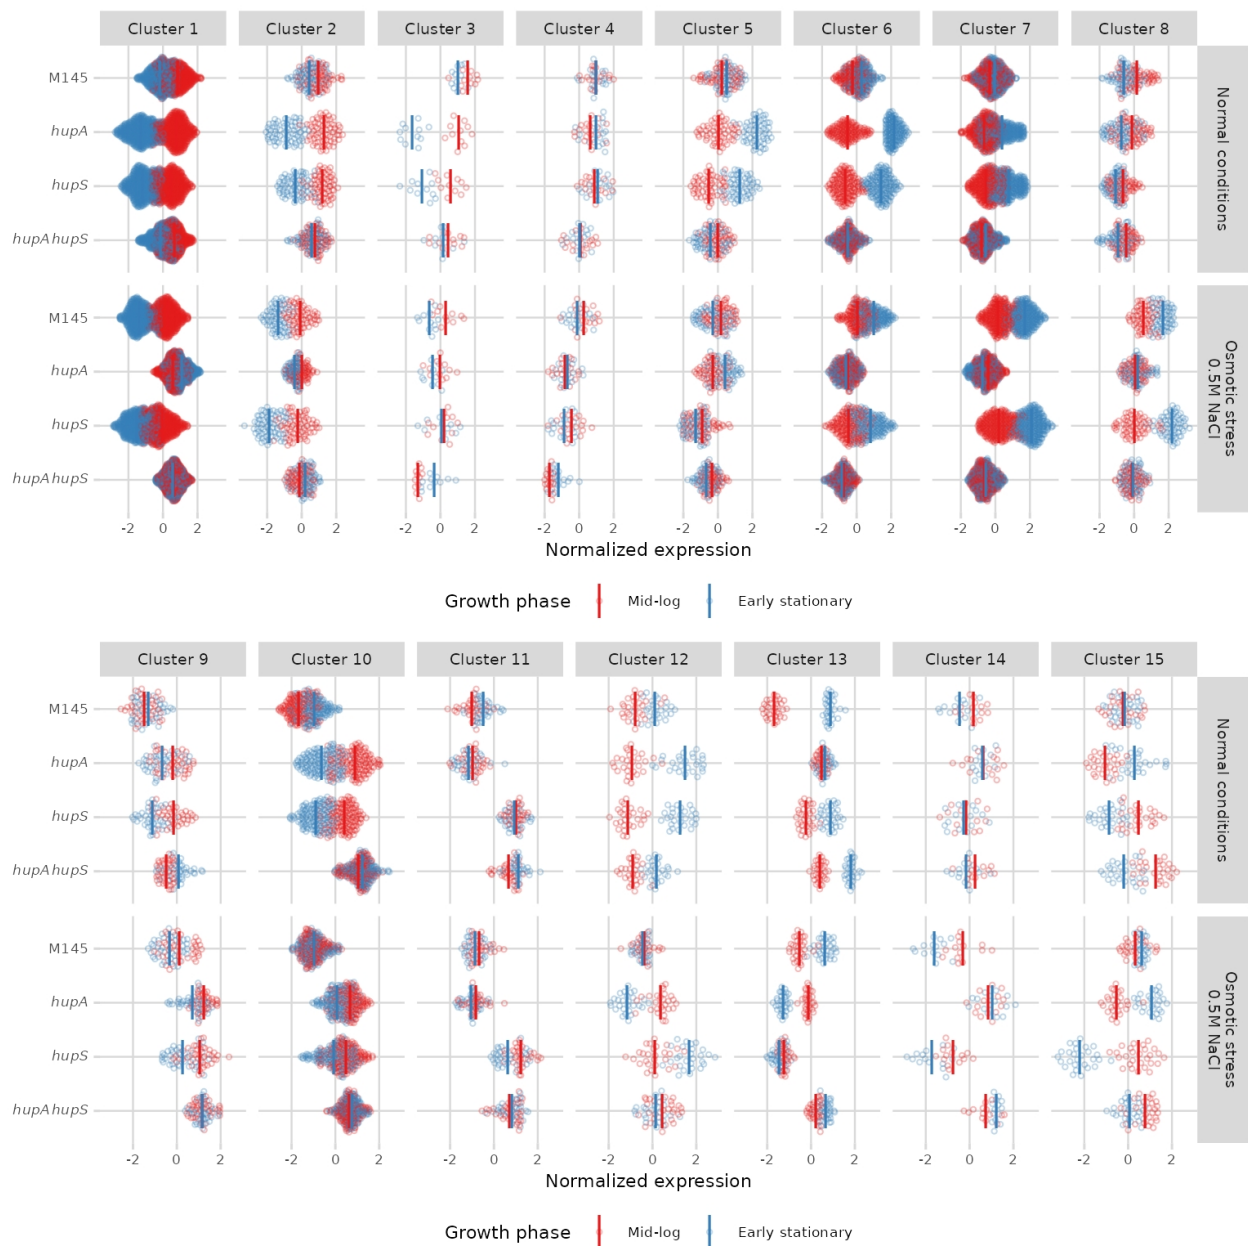

**Figure S9**

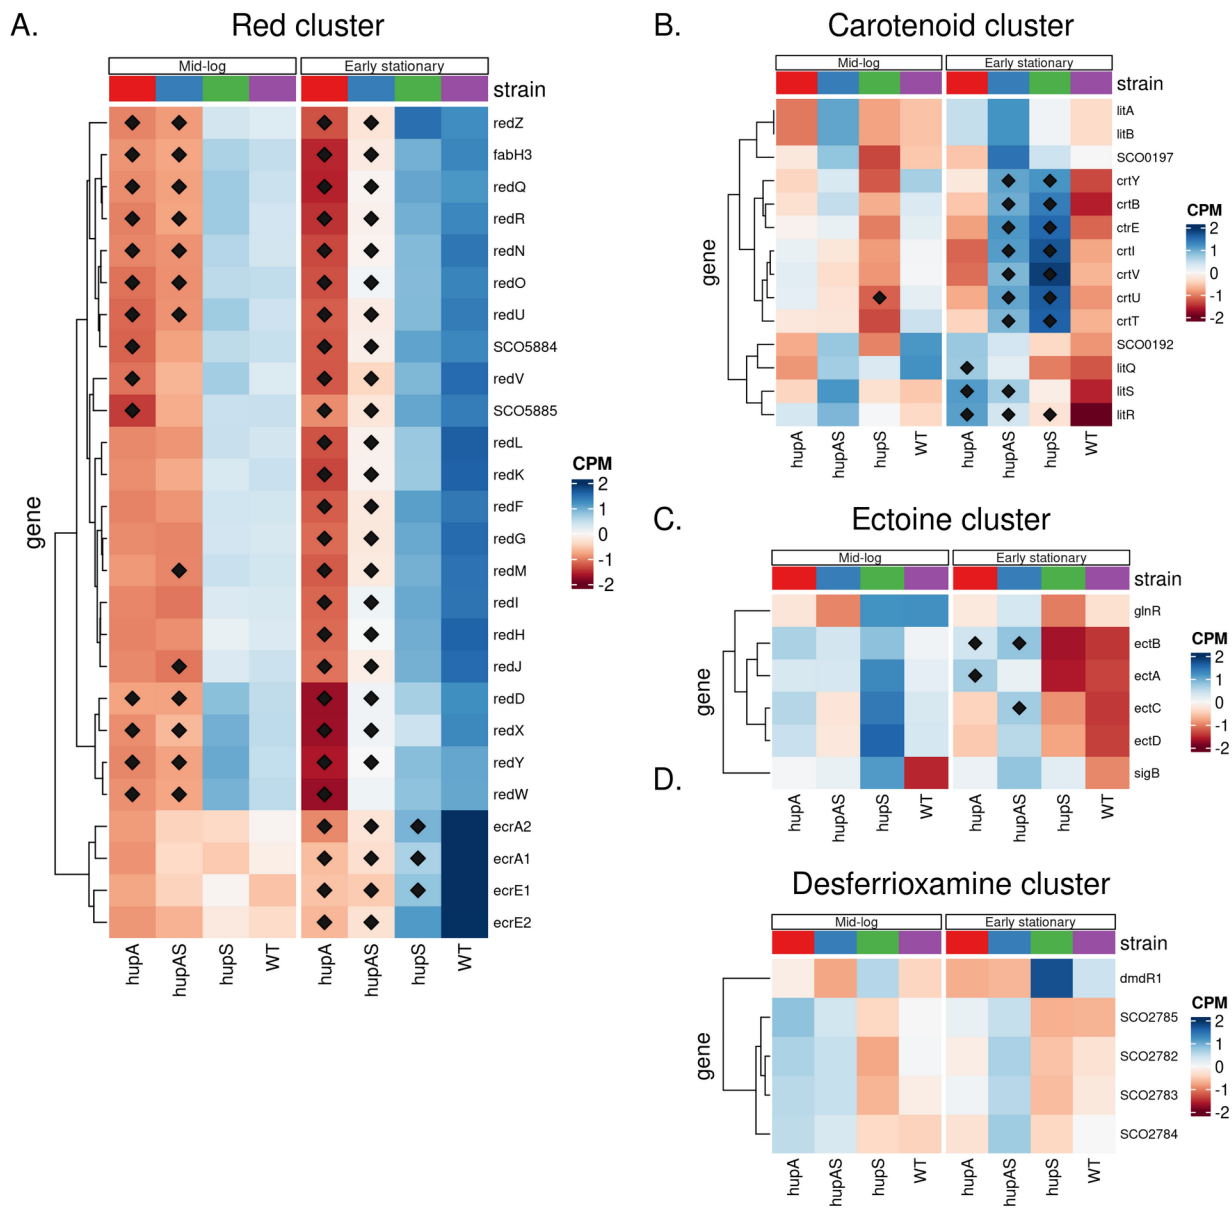

**Figure S10**
